# Supplementary material
Source: Springer Nature journal article supplement (https://www.springermedizin.de/resource/supplementary/13098_2013_300_MOESM6_ESM.pdf/9671016)

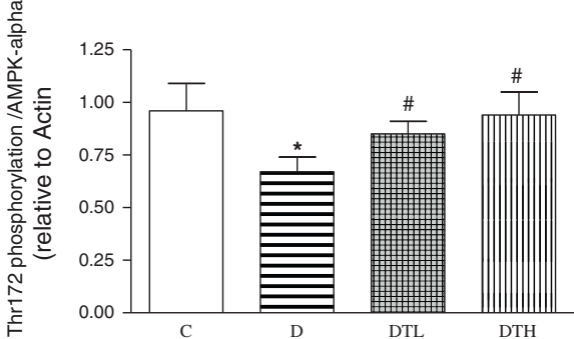

P-AMPK- $\alpha$

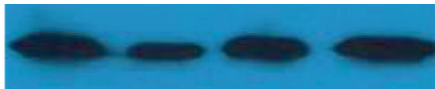

AMPK- $\alpha$

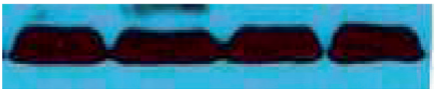

Beta-actin

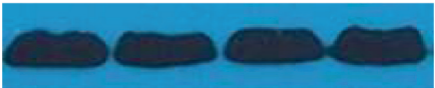

Supplement: MOESM6 [file 9671016]
